# Supplementary material for: Molecular detection of omicron SARS-CoV-2 variant is achieved by RT-LAMP despite genomic mutations
Source: PubMed Central journal article supplement (PMC9219828; doi:10.1590/0074-02760220050), 2022-06-22
Supplement: 1678-8060-mioc-117-e220050-s.pdf [file 1678-8060-mioc-117-e220050-s.pdf]

TABLE

Data of the samples used in the study. The samples were sequenced by Next Generation Sequencing (NGS), on the Illumina MiSeq platform. All sequences were deposited in the GISAID database. Pangolin (Pango v.4.0.4 PLEARN-v1.3) was used to identify the variants. AA: aminoacid; NP: Not Performed.

| Sample | Ct E gene | Ct E RdRp | Ct N gene | Collection date | Collection location                                    | Gender | Patient age | Accession ID GISAID | Lineage                         | Sublineage | AA Substitutions                                                                                                                                                                                                                                                                                                                                                                                                                                                                                                                                                                                | Coverage |
|--------|-----------|-----------|-----------|-----------------|--------------------------------------------------------|--------|-------------|---------------------|---------------------------------|------------|-------------------------------------------------------------------------------------------------------------------------------------------------------------------------------------------------------------------------------------------------------------------------------------------------------------------------------------------------------------------------------------------------------------------------------------------------------------------------------------------------------------------------------------------------------------------------------------------------|----------|
| 1      | 24.55     | 28.15     | 24.04     | 2021-12-27      | South America / Brazil / Minas Gerais / Esmeraldas     | Male   | 39          | EPI_ISL_9274974     | VOC Omicron GRA (B.1.1.529+BA.) | BA.1.15    | Spike D614G, Spike D796Y, Spike G142D, Spike G339D, Spike H655Y, Spike L981F, Spike N679K, Spike N764K, Spike N856K, Spike N969K, Spike P681H, Spike Q954H, Spike T95I, Spike T478K, Spike T547K, Spike V143del, Spike Y144del, Spike Y145del, E T9I, M A63T, M D3G, N G204R, N P13L, N R203K, NS7b T40I, NSP3 A1892T, NSP3 K38R, NSP3 L1266I, NSP3 S1265del, NSP4 T492I, NSP5 P132H, NSP6 I189V, NSP12 P323L, NSP14 I42V                                                                                                                                                                       | 651.862x |
| 2      | 24.36     | 28.40     | 24.75     | 2021-12-23      | South America / Brazil / Minas Gerais / Belo Horizonte | Female | 57          | EPI_ISL_9340194     | VOC Omicron GRA (B.1.1.529+BA.) | BA.1.18    | Spike D614G, Spike H655Y, Spike L452R, Spike L981F, Spike N679K, Spike N969K, Spike P681H, Spike Q954H, Spike T95I, Spike T478K, E T9I, M A63T, M D3G, N G204R, N P13L, N R203K, NS7a V82A, NS7b T40I, NSP3 A1892T, NSP3 K38R, NSP4 T492I, NSP12 P323L                                                                                                                                                                                                                                                                                                                                          | 756.638x |
| 3      | 23.57     | 26.62     | 23.40     | 2021-12-23      | South America / Brazil / Minas Gerais / Belo Horizonte | Male   | 62          | EPI_ISL_9274978     | VOC Omicron GRA (B.1.1.529+BA.) | BA.1.15    | Spike D215E, Spike D614G, Spike D796Y, Spike G142D, Spike G339D, Spike H655Y, Spike ins215PEX, Spike L981F, Spike N679K, Spike N764K, Spike N856K, Spike N969K, Spike P681H, Spike Q954H, Spike T95I, Spike T547K, Spike V143del, Spike Y144del, Spike Y145del, E T9I, M A63T, M D3G, M Q19E, N G204R, N P13L, N R203K, NS7b T40I, NSP2 T149I, NSP3 A1892T, NSP3 K38R, NSP3 L1266I, NSP3 S1265del, NSP4 T492I, NSP5 P132H, NSP6 I189V, NSP12 P323L, NSP14 I42V                                                                                                                                  | 1137.59x |
| 4      | 20.87     | 24.46     | 20.86     | 2021-12-27      | South America / Brazil / Minas Gerais / Belo Horizonte | Male   | 46          | EPI_ISL_9274981     | VOC Omicron GRA (B.1.1.529+BA.) | BA.1.14    | Spike D614G, Spike D796Y, Spike G142D, Spike G339D, Spike H655Y, Spike L981F, Spike N501Y, Spike N679K, Spike N764K, Spike N856K, Spike N969K, Spike P681H, Spike Q498R, Spike Q954H, Spike T95I, Spike T547K, Spike V143del, Spike Y144del, Spike Y145del, Spike Y505H, E T9I, M A63T, M D3G, N G204R, N P13L, N R203K, NS7b T40I, NSP3 A1892T, NSP3 K38R, NSP3 L1266I, NSP3 S1265del, NSP4 T492I, NSP5 P132H, NSP6 I189V, NSP12 P323L, NSP14 I42V                                                                                                                                             | 997.739x |
| 5      | 26.68     | 30.06     | 27.73     | 2021-12-27      | South America / Brazil / Minas Gerais / Belo Horizonte | Male   | 32          | EPI_ISL_9274983     | VOC Omicron GRA (B.1.1.529+BA.) | BA.1.14    | Spike D614G, Spike D796Y, Spike G142D, Spike G339D, Spike H655Y, Spike L981F, Spike N679K, Spike N764K, Spike N856K, Spike N969K, Spike P681H, Spike Q954H, Spike R158del, Spike T95I, Spike T547K, Spike V143del, Spike Y144del, Spike Y145del, E T9I, M A63T, M D3G, N G204R, N P13L, N R203K, NS7b T40I, NSP2 A336V, NSP3 A1892T, NSP3 K38R, NSP3 L1266I, NSP3 S1265del, NSP4 T492I, NSP5 P132H, NSP6 I189V, NSP9 T34I, NSP12 P323L, NSP14 I42V                                                                                                                                              | 576.193x |
| 6      | 27.09     | 31.04     | 27.48     | 2021-12-28      | South America / Brazil / Minas Gerais / Belo Horizonte | Female | 60          | EPI_ISL_9274985     | VOC Omicron GRA (B.1.1.529+BA.) | BA.1.15    | Spike D614G, Spike D796Y, Spike G142D, Spike H655Y, Spike L452R, Spike L981F, Spike N679K, Spike N764K, Spike N856K, Spike N969K, Spike P681H, Spike Q954H, Spike T95I, Spike T478K, Spike T547K, Spike V143del, Spike Y144del, Spike Y145del, E T9I, M A63T, M D3G, N G204R, N P13L, N R203K, NS7b T40I, NSP3 A1892T, NSP3 K38R, NSP3 L1266I, NSP3 S1265del, NSP4 T492I, NSP5 P132H, NSP6 I189V, NSP12 P323L, NSP14 I42V                                                                                                                                                                       | 1208.94x |
| 7      | 20.89     | 25.02     | 21.65     | 2021-12-29      | South America / Brazil / Minas Gerais / Belo Horizonte | Female | 21          | EPI_ISL_9274986     | VOC Omicron GRA (B.1.1.529+BA.) | BA.1.14    | Spike D215E, Spike D614G, Spike D796Y, Spike G142D, Spike G339D, Spike H655Y, Spike ins215PEX, Spike L981F, Spike N679K, Spike N764K, Spike N856K, Spike N969K, Spike P681H, Spike Q954H, Spike P681H, Spike Q954H, Spike S373P, Spike S375F, Spike T95I, Spike T547K, Spike V143del, Spike Y144del, Spike Y145del, E T9I, M A63T, M D3G, M Q19E, N G204R, N P13L, N R203K, NSP3 A1892T, NSP3 K38R, NSP3 L1266I, NSP3 S1265del, NSP4 T492I, NSP5 P132H, NSP6 I189V, NSP12 P323L, NSP14 I42V                                                                                                     | 1122.36x |
| 8      | 27.11     | 30.83     | 27.16     | 2021-12-29      | South America / Brazil / Minas Gerais / Belo Horizonte | Female | 18          | EPI_ISL_9274987     | VOC Omicron GRA (B.1.1.529+BA.) | BA.1.14    | Spike D614G, Spike D796Y, Spike G142D, Spike G339D, Spike H655Y, Spike L981F, Spike N679K, Spike N764K, Spike N856K, Spike N969K, Spike P681H, Spike Q954H, Spike T95I, Spike T547K, Spike V143del, Spike Y144del, Spike Y145del, E T9I, M A63T, M D3G, M Q19E, N G204R, N P13L, N R203K, NSP2 I251M, NSP3 A1892T, NSP3 K38R, NSP3 L1266I, NSP3 S1265del, NSP4 T492I, NSP5 P132H, NSP6 I189V, NSP12 P323L, NSP14 I42V                                                                                                                                                                           | 633.878x |
| 9      | 26.75     | 30.03     | 26.90     | 2021-12-30      | South America / Brazil / Minas Gerais / Belo Horizonte | Male   | 49          | EPI_ISL_9274988     | VOC Omicron GRA (B.1.1.529+BA.) | BA.1.14    | Spike D614G, Spike D796Y, Spike G142D, Spike G339D, Spike H655Y, Spike L981F, Spike N679K, Spike N764K, Spike N856K, Spike N969K, Spike P681H, Spike Q954H, Spike T95I, Spike T547K, Spike V143del, Spike Y144del, Spike Y145del, E T9I, M A63T, M D3G, M Q19E, N G204R, N P13L, N R203K, NS7b T40I, NSP2 I251M, NSP3 A1892T, NSP3 K38R, NSP3 L1266I, NSP3 S1265del, NSP4 T492I, NSP5 P132H, NSP6 I189V, NSP12 P323L, NSP14 I42V                                                                                                                                                                | 755.294x |
| 10     | 22.07     | 25.88     | 22.35     | 2021-12-29      | South America / Brazil / Minas Gerais / Belo Horizonte | Female | 60          | EPI_ISL_9274989     | VOC Omicron GRA (B.1.1.529+BA.) | BA.1.14    | Spike D614G, Spike D796Y, Spike G142D, Spike G339D, Spike H655Y, Spike L981F, Spike N679K, Spike N764K, Spike N856K, Spike N969K, Spike P681H, Spike Q954H, Spike T95I, Spike T547K, Spike V143del, Spike Y144del, Spike Y145del, E T9I, M A63T, M D3G, M Q19E, N G204R, N P13L, N R203K, NS3 A110S, NSP2 I251M, NSP3 A1892T, NSP3 K38R, NSP3 L1266I, NSP3 S1265del, NSP4 T492I, NSP5 P132H, NSP6 I189V, NSP12 P323L, NSP14 I42V                                                                                                                                                                | 419.171x |
| 11     | 29.375    | NP        | NP        | 2021-12-25      | South America / Brazil / Minas Gerais / Belo Horizonte | Female | 44          | EPI_ISL_9747676     | VOC Omicron GRA (B.1.1.529+BA.) | BA.1.13    | Spike D614G, Spike D796Y, Spike G142D, Spike H655Y, Spike L981F, Spike N679K, Spike N764K, Spike N856K, Spike N969K, Spike P681H, Spike Q954H, Spike T95I, Spike T547K, Spike V143del, Spike Y144del, Spike Y145del, M I82T, N G215C, N P13L, N R203M, NS7a V82A, NS7b T40I, NSP3 A1892T, NSP3 K38R, NSP3 L1266I, NSP3 S1265del, NSP4 T492I, NSP5 P132H, NSP6 I189V, NSP12 P323L, NSP14 I42V                                                                                                                                                                                                    | 880.138x |
| 12     | 21.67     | 25.48     | 20.40     | 2022-01-17      | South America / Brazil / Minas Gerais / Belo Horizonte | Male   | 17          | EPI_ISL_10706103    | VOC Omicron GRA (B.1.1.529+BA.) | BA.1.15    | Spike D614G, Spike D796Y, Spike E484A, Spike G142D, Spike G339D, Spike G446S, Spike G496S, Spike H655Y, Spike K417N, Spike L981F, Spike N440K, Spike N501Y, Spike N679K, Spike N764K, Spike N856K, Spike N969K, Spike P681H, Spike Q493R, Spike Q498R, Spike Q954H, Spike S371L, Spike S373P, Spike S375F, Spike S477N, Spike T95I, Spike T478K, Spike T547K, Spike V143del, Spike Y144del, Spike Y145del, Spike Y505H, E T9I, M A63T, M D3G, M Q19E, N G204R, N P13L, N R203K, NSP3 A1892T, NSP3 K38R, NSP3 L1266I, NSP3 S1265del, NSP4 T492I, NSP5 P132H, NSP6 I189V, NSP12 P323L, NSP14 I42V | 443.91x  |
| 13     | 22.69     | 26.63     | 23.87     | 2022-01-17      | South America / Brazil / Minas Gerais / Belo Horizonte | Female | 84          | EPI_ISL_10706104    | VOC Omicron GRA (B.1.1.529+BA.) | BA.1.14    | Spike D614G, Spike D796Y, Spike G142D, Spike G339D, Spike G496S, Spike H655Y, Spike L981F, Spike N679K, Spike N764K, Spike N856K, Spike N969K, Spike P681H, Spike Q493R, Spike Q954H, Spike T95I, Spike T547K, Spike V143del, Spike Y144del, Spike Y145del, E T9I, M A63T, M D3G, M Q19E, N G204R, N P13L, N R203K, NSP2 I251M, NSP3 A1892T, NSP3 K38R, NSP3 L1266I, NSP3 S1265del, NSP4 T492I, NSP5 P132H, NSP6 I189V, NSP12 P323L, NSP14 I42V                                                                                                                                                 | 330.01x  |
| 14     | 24.92     | 29.18     | 25.83     | 2022-01-17      | South America / Brazil / Minas Gerais / Belo Horizonte | Female | 60          | EPI_ISL_10706105    | VOC Omicron GRA (B.1.1.529+BA.) | BA.1.14    | Spike D614G, Spike D796Y, Spike G142D, Spike G339D, Spike H655Y, Spike L981F, Spike N679K, Spike N764K, Spike N856K, Spike N969K, Spike P681H, Spike Q954H, Spike T95I, Spike T547K, Spike V143del, Spike Y144del, Spike Y145del, E T9I, M A63T, M D3G, N G204R, N P13L, N R203K, NSP2 I251M, NSP3 A1892T, NSP3 K38R, NSP3 L1266I, NSP3 S1265del, NSP4 T492I, NSP5 P132H, NSP6 I189V, NSP12 P323L, NSP14 I42V                                                                                                                                                                                   | 227.78x  |
| 15     | 19.99     | 22.32     | 20.61     | 2022-01-17      | South America / Brazil / Minas Gerais / Belo Horizonte | Female | 73          | EPI_ISL_10706106    | VOC Omicron GRA (B.1.1.529+BA.) | BA.1.14    | Spike D614G, Spike D796Y, Spike G142D, Spike G339D, Spike H655Y, Spike L981F, Spike N679K, Spike N764K, Spike N856K, Spike N969K, Spike P681H, Spike Q954H, Spike T95I, Spike T547K, Spike V143del, Spike Y144del, Spike Y145del, E T9I, M A63T, M D3G, M Q19E, N G204R, N P13L, N R203K, NSP2 I251M, NSP3 A1892T, NSP3 K38R, NSP3 L1266I, NSP3 S1265del, NSP4 T492I, NSP5 P132H, NSP6 I189V, NSP12 P323L, NSP14 I42V                                                                                                                                                                           | 309.39x  |
| 16     | 22.68     | 25.95     | 23.70     | 2022-01-17      | South America / Brazil / Minas Gerais / Belo Horizonte | Male   | 71          | EPI_ISL_10706107    | VOC Omicron GRA (B.1.1.529+BA.) | BA.1.14    | Spike D614G, Spike D796Y, Spike G142D, Spike G339D, Spike H655Y, Spike L981F, Spike N679K, Spike N764K, Spike N856K, Spike N969K, Spike P681H, Spike Q954H, Spike S371L, Spike S373P, Spike S375F, Spike T95I, Spike T547K, Spike V143del, Spike Y144del, Spike Y145del, E T9I, M A63T, M D3G, M Q19E, N G204R, N P13L, N R203K, NSP2 I251M, NSP3 A1892T, NSP3 K38R, NSP3 L1266I, NSP3 S1265del, NSP4 T492I, NSP5 P132H, NSP6 I189V, NSP12 P323L, NSP14 I42V                                                                                                                                    | 351.04x  |

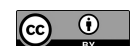

| Sample | Ct E gene | Ct E RdRp | Ct N gene | Collection date | Collection location                                    | Gender | Patient age | Accession ID GISAID | Lineage                         | Sublineage | AA Substitutions                                                                                                                                                                                                                                                                                                                                                                                                                                                                                                                                                                                                                        | Coverage |
|--------|-----------|-----------|-----------|-----------------|--------------------------------------------------------|--------|-------------|---------------------|---------------------------------|------------|-----------------------------------------------------------------------------------------------------------------------------------------------------------------------------------------------------------------------------------------------------------------------------------------------------------------------------------------------------------------------------------------------------------------------------------------------------------------------------------------------------------------------------------------------------------------------------------------------------------------------------------------|----------|
| 17     | 27.11     | 29.96     | 27.4      | 2022-02-18      | South America / Brazil / Minas Gerais / Belo Horizonte | Male   | 63          | EPI_ISL_11133066    | VOC Omicron GRA (B.1.1.529+BA.) | BA.2.10    | Spike D405N, Spike D614G, Spike D796Y, Spike G142D, Spike G339D, Spike H655Y, Spike K417N, Spike L84I, Spike N679K, Spike N764K, Spike N969K, Spike P681H, Spike Q954H, Spike R408S, Spike S371F, Spike S373P, Spike S375F, Spike T19I, Spike T376A, Spike V213G, E T9I, M A63T, M Q19E, N G204R, N P13L, N R203K, N S413R, NS3 T223I, NSP1 S135R, NSP3 G489S, NSP3 T24I, NSP4 L264F, NSP4 L438F, NSP4 T327I, NSP4 T492I, NSP5 P132H, NSP6 F108del, NSP6 G107del, NSP6 S106del, NSP12 P323L, NSP13 R392C, NSP14 I42V, NSP15 T112I                                                                                                       | 496.288x |
| 18     | 21.35     | 24.62     | 21.95     | 2022-02-21      | South America / Brazil / Minas Gerais / Belo Horizonte | Female | 40          | EPI_ISL_11133075    | VOC Omicron GRA (B.1.1.529+BA.) | BA.2.9     | Spike D405N, Spike D614G, Spike D796Y, Spike E484A, Spike G142D, Spike G339D, Spike H655Y, Spike K417N, Spike N501Y, Spike N679K, Spike N764K, Spike N969K, Spike P681H, Spike Q493R, Spike Q498R, Spike Q954H, Spike R408S, Spike S371F, Spike S373P, Spike S375F, Spike S477N, Spike T19I, Spike T376A, Spike T478K, Spike V213G, Spike Y505H, E T9I, M A63T, M Q19E, N G204R, N P13L, N R203K, N S413R, NS3 T223I, NSP1 S135R, NSP3 G489S, NSP3 T24I, NSP4 L264F, NSP4 L438F, NSP4 T327I, NSP4 T492I, NSP5 P132H, NSP6 F108del, NSP6 G107del, NSP6 S106del, NSP12 P323L, NSP13 R392C, NSP14 I42V, NSP15 T112I                        | 746.904x |
| 19     | 24.5      | 28.96     | 25.35     | 2022-02-23      | South America / Brazil / Minas Gerais / Belo Horizonte | Female | 79          | EPI_ISL_11133082    | VOC Omicron GRA (B.1.1.529+BA.) | BA.2.9     | Spike D405N, Spike D614G, Spike D796Y, Spike E484A, Spike G142D, Spike G339D, Spike H655Y, Spike K417N, Spike N501Y, Spike N679K, Spike N764K, Spike N969K, Spike P681H, Spike Q493R, Spike Q498R, Spike Q954H, Spike R408S, Spike S371F, Spike S373P, Spike S375F, Spike S477N, Spike T19I, Spike T376A, Spike T478K, Spike V213G, Spike V622I, Spike Y505H, E T9I, M A63T, M Q19E, N G204R, N P13L, N R203K, N S413R, NS3 T12I, NS3 T223I, NSP1 S135R, NSP3 G489S, NSP3 T24I, NSP4 L264F, NSP4 L438F, NSP4 T327I, NSP4 T492I, NSP5 P132H, NSP6 F108del, NSP6 G107del, NSP6 S106del, NSP12 P323L, NSP13 R392C, NSP14 I42V, NSP15 T112I | 691.909x |
| 20     | 23.81     | 26.79     | 24.62     | 2022-02-25      | South America / Brazil / Minas Gerais / Belo Horizonte | Male   | 41          | EPI_ISL_11133089    | VOC Omicron GRA (B.1.1.529+BA.) | BA.2.10    | Spike D405N, Spike D614G, Spike D796Y, Spike G142D, Spike G339D, Spike H655Y, Spike K417N, Spike N501Y, Spike N679K, Spike N764K, Spike N969K, Spike P681H, Spike Q954H, Spike R408S, Spike S371F, Spike S373P, Spike S375F, Spike T19I, Spike V213G, Spike Y505H, E T9I, M A63T, M Q19E, N G204R, N P13L, N R203K, N S413R, NS3 T223I, NSP1 S135R, NSP3 G489S, NSP3 T24I, NSP4 L264F, NSP4 L438F, NSP4 T327I, NSP4 T492I, NSP5 P132H, NSP6 F108del, NSP6 G107del, NSP6 S106del, NSP12 P323L, NSP13 R392C, NSP14 I42V, NSP15 T112I                                                                                                      | 541.729x |

The table shows the data of the samples used in this study. The samples were sequenced by Next-Generation Sequencing (NGS) in Illumina MiSeq platform. All samples were deposited in GISAID database. Pangolin (Pango v.4.0.4 PLEARN-v1.3) was used for the identification of SARS-CoV-2 variants.
